# Supplementary material for: Pan-H7 influenza human antibody virus neutralization depends on avidity and steric hindrance
Source: JCI journal article supplement (doi:10.1172/jci.insight.186182), 2025-06-05
Supplement: sd1 [file 1]

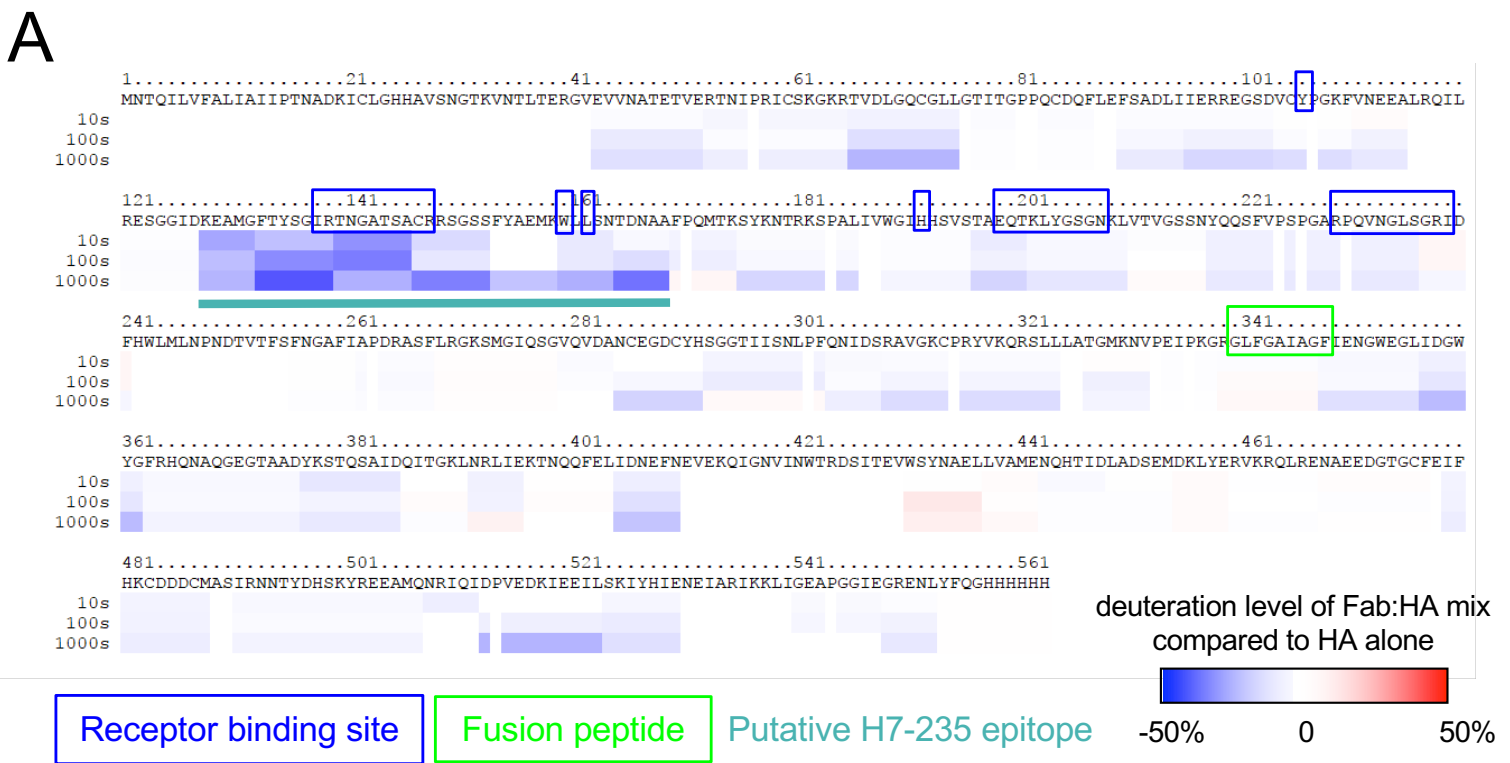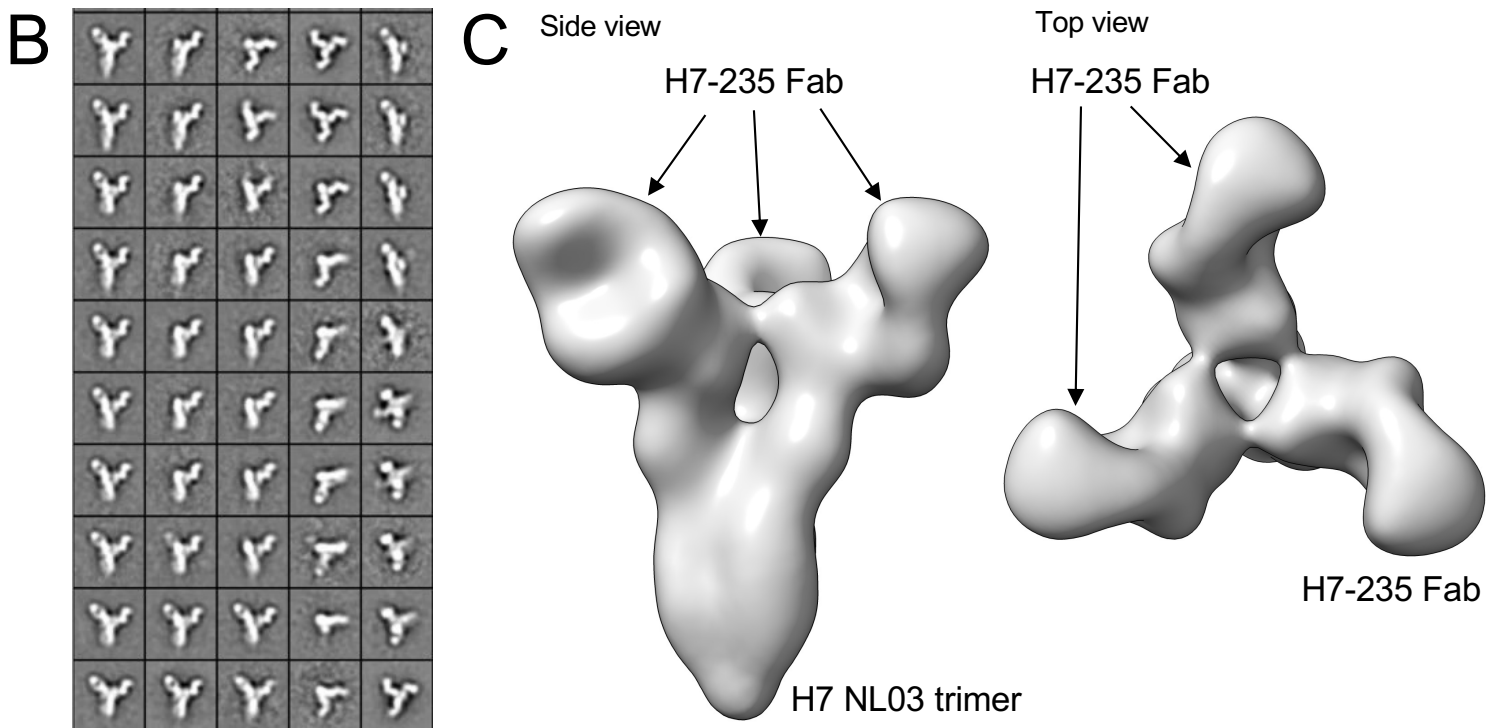

**Figure S1. Hydrogen deuterium exchange mass spectrometry and negative staining electron microscopy data to determine the putative epitope on H7 HA binding by mAb H7-235. Related to Figure 1.**

(A) Influence of mAb H7-235 on deuteration level of soluble trimer H7 HA (SH13 H7N9). The amino acid sequence of the H7 HA is shown with a ribbon diagram indicating differences in deuterium uptake. Blue colors indicating slower deuterium exchange in the presence of H7-235 Fab, while red colors indicate faster deuterium exchange in the presence of H7-235 Fab. Data are shown for 10 s, 100 s, or 1,000 s of deuterium labeling. HA residues are numbered from the start of the H7 HA construct.

(B) Representative subset of single particle nsEM 2D class averages shown with inverted contrast displays H7-235 Fab bound to TPCK-trypsin cleaved H7 A/Netherlands/219/2003 HA.

(C) Reconstructed 3D nsEM map of H7-235 with H7 HA soluble ectodomain trimer from A/Netherlands/219/2003 H7N7.

## Heavy chain

|             | FR1-IMGT<br>(1-26)         | CDR1-IMGT<br>(27-38) | FR2-IMGT<br>(39-55) | CDR2-IMGT<br>(56-65) | FR3-IMGT<br>(66-104)                      | CDR3-IMGT | FR4-IMGT |             |    |    |     |     |     |
|-------------|----------------------------|----------------------|---------------------|----------------------|-------------------------------------------|-----------|----------|-------------|----|----|-----|-----|-----|
|             | 1                          | 10                   | 20                  | 30                   | 40                                        | 50        | 60       | 70          | 80 | 90 | 100 | 110 | 120 |
| IGHV3-33*01 | QVQLVESGG.GVVQPGRSLRLSCAAS | GFTF...SSYG          | MHWVRQAPGKGLEWVAV   | IWYD..GSNK           | YYADSVK.GRFTISRDN SKNTLYLQMN SLRAEDTAVYYC | AR        | YGM DV   | WGQGLTVTVSS |    |    |     |     |     |
| H7-235rev   | QVQLVESGG.GVVQPGRSLRLSCAAS | GFTF...SSYG          | MHWVRQAPGKGLEWVAV   | IWYD..GSNK           | YYADSVK.GRFTISRDN SKNTLYLQMN SLRAEDTAVYYC | ARNGERWR  | YGM DV   | WGQGLTVTVSS |    |    |     |     |     |
| H7-235      | QVQLVESGG.GVVQPGSLRLSCAAS  | GFTF...RTYG          | MHWVRQAPGKGLEWVAV   | IWYD..GSNK           | YYADSVK.GRFTISRDN SKNTLYLQMN SLRAEDTAVYYC | ARNGERWR  | YGM DV   | WGQGLTVTVSS |    |    |     |     |     |

## Light chain

|             | FR1-IMGT<br>(1-26)          | CDR1-IMGT<br>(27-38) | FR2-IMGT<br>(39-55) | CDR2-IMGT<br>(56-65) | FR3-IMGT<br>(66-104)                    | CDR3-IMGT | FR4-IMGT   |          |    |    |     |     |     |
|-------------|-----------------------------|----------------------|---------------------|----------------------|-----------------------------------------|-----------|------------|----------|----|----|-----|-----|-----|
|             | 1                           | 10                   | 20                  | 30                   | 40                                      | 50        | 60         | 70       | 80 | 90 | 100 | 110 | 120 |
| IGKV2-28*01 | DIVMTQSPLSLPVTTPGEPASISCRSS | QSL LHS.NGNY         | LDWYLQKPGQSPQLLIY   | LG.....S             | NRASGVP.DRFSGSG..SGTDFTLKISRVEAEDVGVYYC | MQALQTP   | FGQGTRLEIK | IGKJ5*01 |    |    |     |     |     |
| H7-235 rev  | DIVMTQSPLSLPVTTPGEPASISCRSS | QSL LHS.NGNY         | LDWYLQKPGQSPQLLIY   | LG.....S             | NRASGVP.DRFSGSG..SGTDFTLKISRVEAEDVGVYYC | MQALQTPIT | FGQGTRLEIK |          |    |    |     |     |     |
| H7-235      | IVMTQSPLSLPVTTPGEPASISCRSS  | QSL LHS.NGNY         | LDWYLQKPGQSPQLLIY   | LG.....S             | NRASGVP.DRFSGSG..SGTDFTLKISRVEAEDVGVYYC | MQALQTPIT | FGQGTRLEIK |          |    |    |     |     |     |

**Figure S2. Germline sequence analysis and germline revertant for H7-235. Related to Figure 3A.** Alignment of IGHV3-33\*01/IGKV2-28\*01 germline sequences to the mAbs H7-235 and H7-235 revertant (H7-235rev). Mutations unique for H7-235 are highlighted in blue. The residues highlighted in red and orange represent the paratope in a heavy and light chains, respectively.

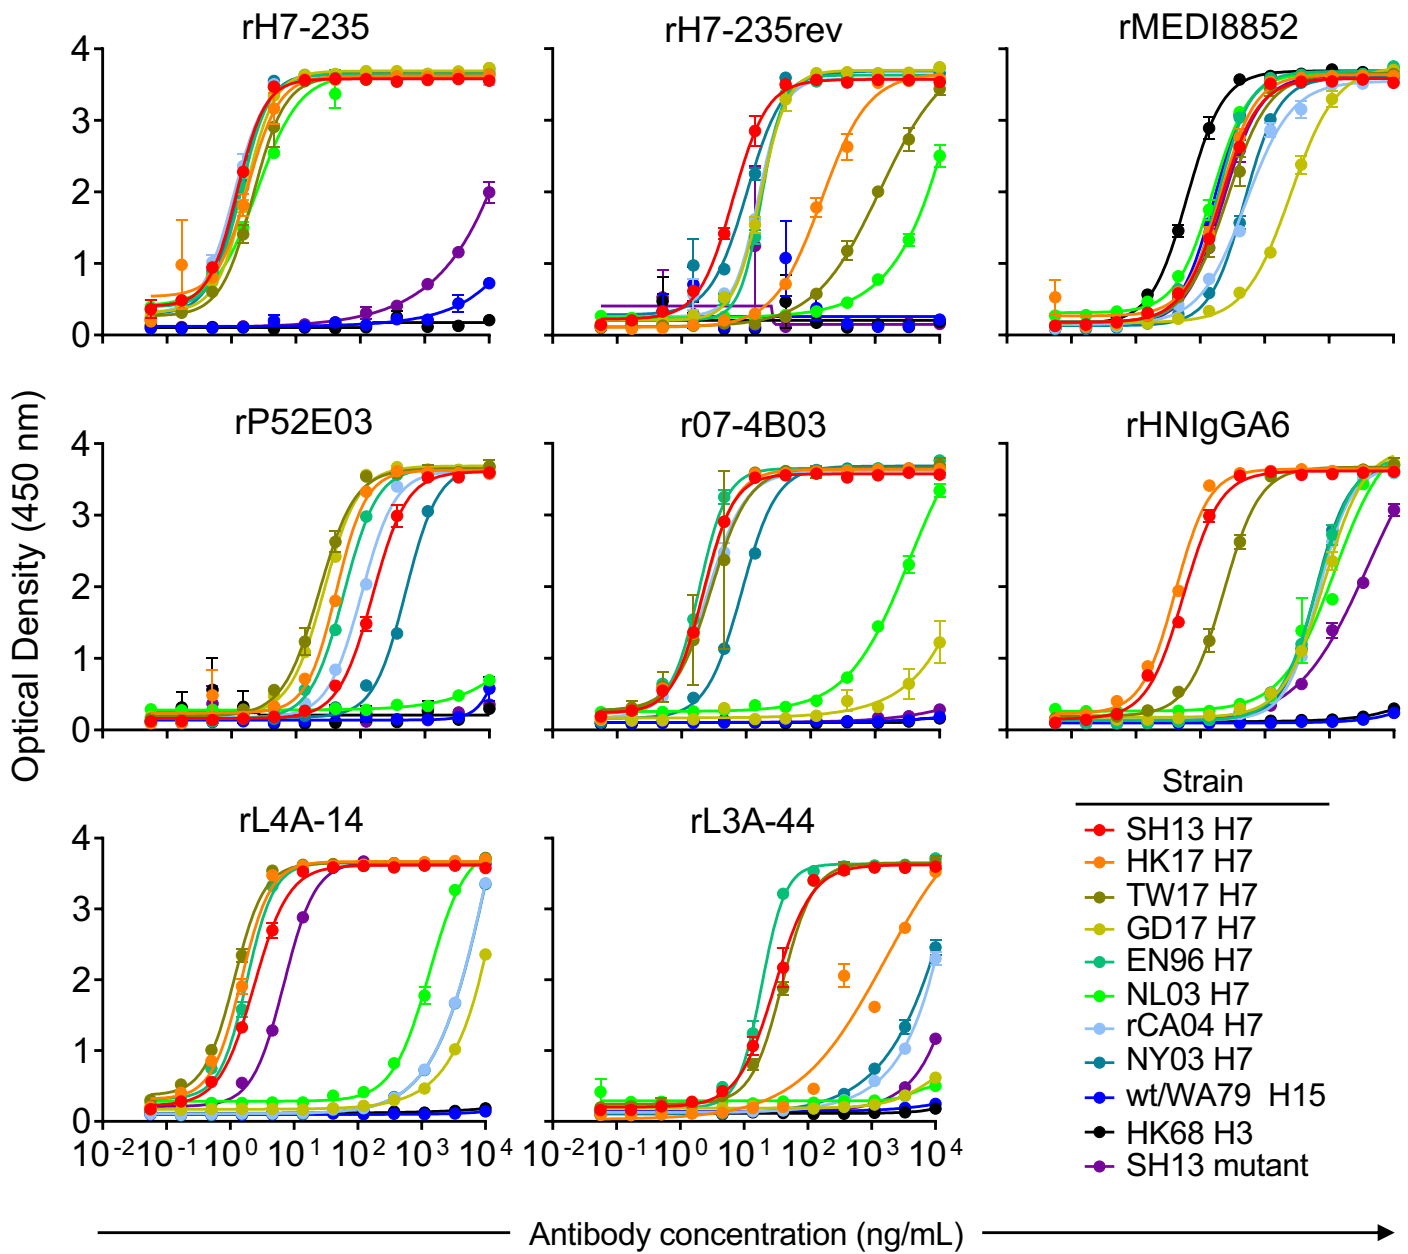

**Figure S3. Concentration dependent curves used for effective concentration calculations in Figure 3A.**

MAbs rH7-235 IgG1, rH7-235rev IgG1, rMEDI8852 IgG1, rP52E03 IgG1, r07-4B03 IgG1, rHNIgGA6 IgG1, rL4A-14 IgG1, rL3A-44 IgG1 were tested in three-fold serial dilutions for binding with recombinant soluble proteins from A/Shanghai/02/2013 (SH13 H7N9), A/Hong Kong/1/2017 (HK17 H7N9), A/Taiwan/01/2017 (TW17 H7N9), A/Guangdong/8H324/2017 (GD17 H7N9), A/England/268/1996 (EN96 H7N7), A/Netherlands/219/2003 (NL03 H7N7), A/Canada/rv504/2004 (rCA04 H7N3), A/New York/107/2003 (NY03 H7N2), A/shearwater/Western Australia/2576/1979 (wtWA79 H15N9), A/Hong Kong/1/1968 (HK68 H3N2), and triple mutant R141G/S145P/S146P on SH13 H7N9 background. Data represents one of two independent experiments, shown as mean  $\pm$  SD of assay triplicates.

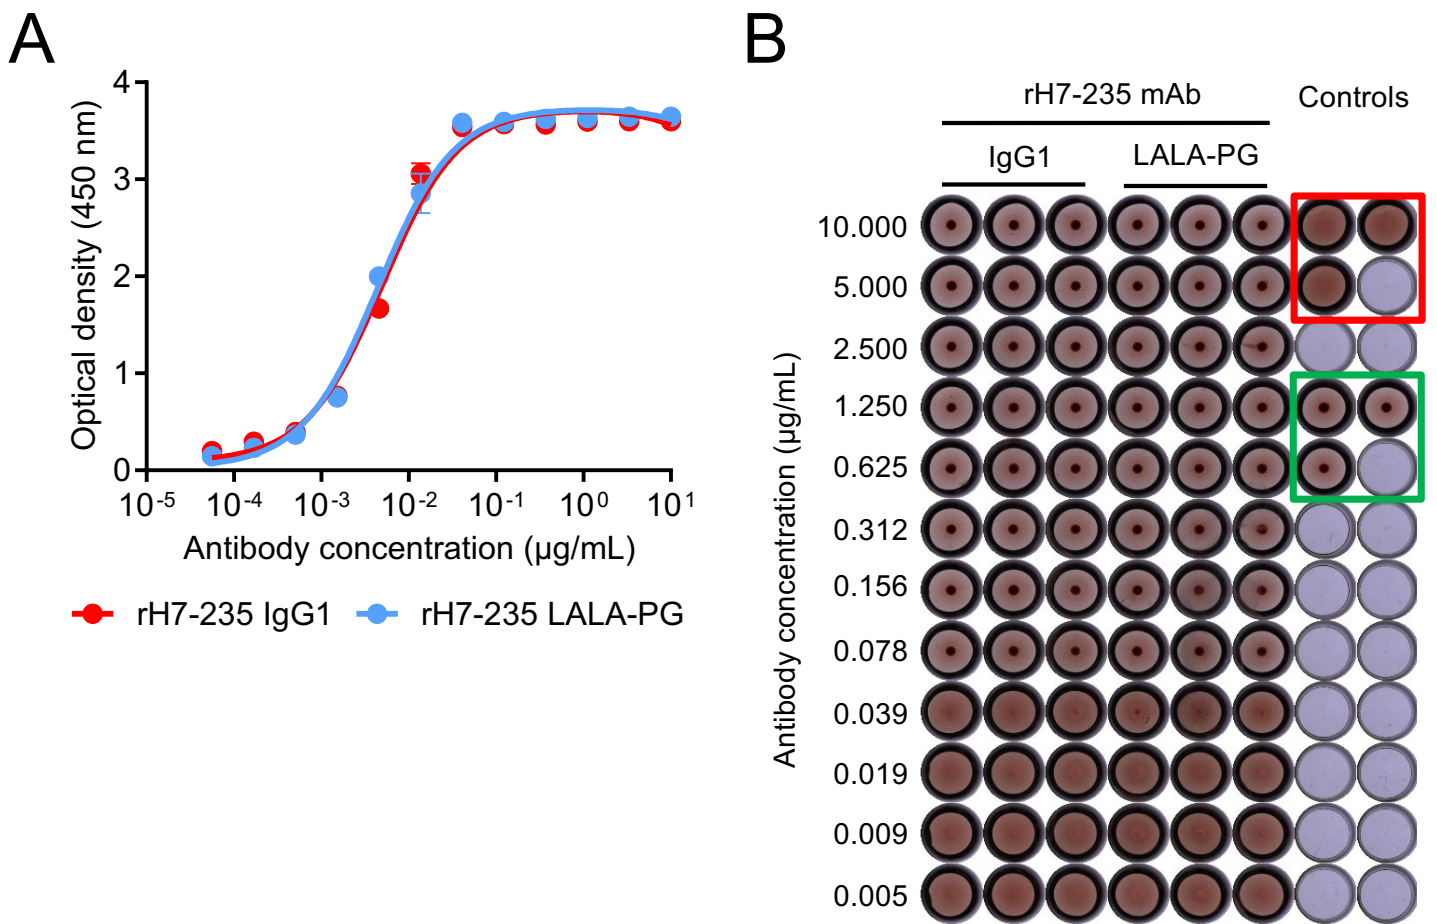

**Figure S4. rH7-235 LALA-PG and rH7-235 IgG1 have comparable reactivity and HAI *in vitro*, related to Figure 4.**

(A) MAbs rH7-235 IgG1 and rH7-235 LALA-PG were tested in three-fold serial dilutions for binding with recombinant soluble proteins from A/Shanghai/02/2013 (SH13 H7N9), shown as mean  $\pm$  SD of assay triplicates.

(B) rH7-235 IgG1 and rH7-235 LALA-PG were tested in serial dilutions for hemagglutination inhibition of A/Shanghai/02/2013 H7N9; red boxes indicate virus and 1% turkey red blood cells without mAb, and green boxes indicate controls with only 1% turkey red blood cells.

SUPPLEMENTAL TABLE

**Table S1. Data collection and refinement statistics for the crystals of H7-235/H7-HA1 complexes, Related to Figure 1**

|                         |                     |
|-------------------------|---------------------|
| Data collection         |                     |
| Crystal                 | H7-235/H7-HA1       |
| PDB ID                  | 9BT5                |
| Wavelength (Å)          | 0.97872             |
| Space group             | C 1 2 1             |
| Unit cell dimensions    |                     |
| a, b, c (Å)             | 240.6, 95.05, 99.26 |
| α, β, γ                 | 90, 95.85, 90       |
| Resolution (Å)          | 49.37 – 2.50        |
| Unique reflections      | 76766 (11112)       |
| Redundancy              | 3.9 (3.9)           |
| Completeness (%)        | 99.6 (99.2)         |
| R <sub>merge</sub> (%)  | 9.6 (86.2)          |
| I/σ(I)                  | 9.9 (1.7)           |
| Refinement statistics   |                     |
| R <sub>factor</sub> (%) | 19.50               |
| R <sub>free</sub> (%)   | 25.10               |
| R.m.s.d. (bond) (Å)     | 0.010               |
| R.m.s.d. (angle) (deg)  | 1.113               |
| Ramachandran plot       |                     |
| Favored (%)             | 94.50               |
| Allowed (%)             | 5.04                |
| Outliers (%)            | 0.46                |

$R_{\text{merge}} = \frac{\sum \sum |I_{hkl} - I_{hkl(j)}|}{\sum I_{hkl}}$ , where  $I_{hkl(j)}$  is the observed intensity and  $I_{hkl}$  is the final average intensity.

$R_{\text{work}} = \frac{\sum ||F_{\text{obs}}| - |F_{\text{calc}}||}{\sum |F_{\text{obs}}|}$  and  $R_{\text{free}} = \frac{\sum ||F_{\text{obs}}| - |F_{\text{calc}}||}{\sum |F_{\text{obs}}|}$ , where  $R_{\text{free}}$  and  $R_{\text{work}}$  are calculated using a randomly selected test set of 5% of the data and all reflections excluding the 5% test set, respectively. Numbers in parentheses are for the highest resolution shell.
